# Supplementary material for: Mitochondrial proteomics investigation of a cellular model of impaired dopamine homeostasis, an early step in Parkinson's disease pathogenesis
Source: Royal Society of Chemistry journal article supplement (doi:10.1039/c3mb70611g), 2014-03-10
Supplement: c3mb70611g2.xlsx [file c3mb70611g2.xlsx]

## Sheet: Table S1
Table S1: Protein identification by ESI-TRAP LC-MS
Spot_ID	UniProt_ID	Gene Name	Proteins description	Mascot Protein Score	Theoretical Protein Mass(Da)	Protein Sequence Coveage (%)	Theoretical Potein pI	Peptide measured _m/z	Peptide measured_mr	Peptide mass charge_z	Peptide calculated _mr	Peptide delta mass error	Peptide missed cleaveage	Mascot Peptide Score	Peptide Sequence	Peptide Variable Modifcation
5071	P60709	ACTB_HUMAN	Actin, cytoplasmic 1	37	42052	8.3	5.29	488.825	975.636	2	975.441	0.1954	0	36.92	AGFAGDDAPR
								566.868	1131.72	2	1131.52	0.2013	0	9.96	GYSFTTTAER
								599.806	1197.6	2	1197.52	0.0831	0	4.81	DSYVGDEAQSK
	P0CG38	POTEI_HUMAN	POTE ankyrin domain family member I	37	122858	4.4	5.83	384.892	767.77	2	767.404	0.3659	0	2.98	HQSQLR
								488.825	975.636	2	975.441	0.1954	0	36.92	AGFAGDDAPR
								767.686	1533.36	2	1533.67	-0.3158	1	2.36	MSQEPEINKDGDR	Oxidation (M)
								984.727	1967.44	2	1967.07	0.366	0	5.95	VAPEEHPILLTEAPLNPK
5084	P60709	ACTB_HUMAN	Actin, cytoplasmic 1	699	42052	40.5	5.29	677.843	1353.67	2	1353.62	0.0557	1	80.32	DSYVGDEAQSKR	2 Oxidation (M)
								488.752	975.489	2	975.441	0.0477	0	74.34	AGFAGDDAPR
								488.752	975.489	2	975.441	0.0477	0	74.34	AGFAGDDAPR
								599.77	1197.52	2	1197.52	0.0099	0	72.26	DSYVGDEAQSK	Oxidation (M)
								566.823	1131.63	2	1131.52	0.1128	0	65.51	GYSFTTTAER	Oxidation (M)
								589.338	1176.66	2	1176.61	0.0554	0	61.99	EITALAPSTMK
								586.321	1170.63	2	1170.56	0.0632	0	55.26	HQGVMVGMGQK
								597.7	1790.08	3	1789.88	0.1932	0	54.18	SYELPDGQVITIGNER
								581.348	1160.68	2	1160.61	0.0706	0	48.17	EITALAPSTMK
								499.823	997.632	2	997.479	0.1528	0	45.98	DLTDYLMK
								594.367	1186.72	2	1186.56	0.1612	0	43.54	HQGVMVGMGQK	Oxidation (M)
								599.893	1197.77	2	1197.7	0.0733	0	35.43	AVFPSIVGRPR
								599.893	1197.77	2	1197.7	0.0733	0	35.43	AVFPSIVGRPR
								401.911	1202.71	3	1202.55	0.158	0	33.66	HQGVMVGMGQK
								506.254	1515.74	3	1515.7	0.046	0	33.39	QEYDESGPSIVHR
								652.087	1953.24	3	1953.06	0.182	0	31.63	VAPEEHPVLLTEAPLNPK
								462.341	922.668	2	922.56	0.1078	1	28.5	IIAPPERK
								398.272	794.529	2	794.465	0.0635	0	24.16	IIAPPER
								507.782	1013.55	2	1013.47	0.0756	0	22.1	DLTDYLMK
								739.045	2214.11	3	2214.06	0.05	0	14.54	DLYANTVLSGGTTMYPGIADR
								488.135	974.256	2	974.431	-0.1742	0	4.15	GSENSQPEK
								516.954	1547.84	3	1547.81	0.0342	1	0.1	MQKEITALAPSTMK
	Q6S8J3	POTEE_HUMAN	POTE ankyrin domain family member E	274	122882	10.6	5.83	488.752	975.489	2	975.441	0.0477	0	74.34	AGFAGDDAPR	Oxidation (M)
								597.7	1790.08	3	1789.88	0.1932	0	54.18	SYELPDGQVITIGNER
								488.77	975.525	2	975.441	0.0838	0	44.76	AGFAGDDAPR
								656.765	1967.27	3	1967.07	0.2006	0	38.02	VAPEEHPILLTEAPLNPK
								488.775	975.536	2	975.441	0.0953	0	37.64	AGFAGDDAPR
								506.254	1515.74	3	1515.7	0.046	0	33.39	QEYDESGPSIVHR
								895.969	1789.92	2	1789.88	0.039	0	24.04	SYELPDGQVITIGNER
								506.264	1515.77	3	1515.7	0.0743	0	21.7	QEYDESGPSIVHR
								506.264	1515.77	3	1515.7	0.0743	0	21.7	QEYDESGPSIVHR	2 Oxidation (M)
								656.773	1967.3	3	1967.07	0.2251	0	21.57	VAPEEHPILLTEAPLNPK
								597.66	1789.96	3	1789.88	0.0736	0	18.18	SYELPDGQVITIGNER	3 Oxidation (M)
								506.268	1515.78	3	1515.7	0.0863	0	17.9	QEYDESGPSIVHR	Oxidation (M)
								702.027	2103.06	3	2103.02	0.0363	1	14.73	DFLHENSMLREEIAMLR
								758.873	1515.73	2	1515.7	0.0361	0	11.68	QEYDESGPSIVHR
								895.981	1789.95	2	1789.88	0.0636	0	9.36	SYELPDGQVITIGNER	3 Oxidation (M)
								656.796	1967.37	3	1967.07	0.2936	0	8.65	VAPEEHPILLTEAPLNPK
								702.143	2103.41	3	2103.02	0.3817	1	4.94	DFLHENSMLREEIAMLR
								773.137	2316.39	3	2316.05	0.3368	0	4.61	DLYTNTVLSGGTTMYPGMAHR
								488.135	974.256	2	974.431	-0.1742	0	4.15	GSENSQPEK
								760.008	2277	3	2277.19	-0.1855	1	1.79	MVAEVDSMPAASSVKKPFVLR	Oxidation (M)
								790.7	1579.38	2	1579.78	-0.3925	1	1.73	MQKEIAALAPSMMK
								989.114	1976.21	2	1975.95	0.2617	1	1.16	QMLKISSENSNPEQDLK
								532.89	1595.65	3	1595.77	-0.1241	1	1.15	MQKEIAALAPSMMK
								769.352	1536.69	2	1536.72	-0.0277	0	1.05	MVAEVDSMPAASSVK
								1016.59	2031.16	2	2030.92	0.2347	1	1.02	GSENSQPEKMSQEPEINK
								532.889	1595.65	3	1595.77	-0.1257	1	0.75	MQKEIAALAPSMMK
								624.395	1870.16	3	1869.8	0.3631	1	0.49	GSGKSNVGTSGDQDDSTMK	Oxidation (M)
								723.854	1445.69	2	1445.77	-0.0804	1	0.44	EIAALAPSMMKIR
								896.73	2687.17	3	2687.25	-0.0826	1	0.37	DLYTNTVLSGGTTMYPGMAHRMQK
	P0CG39	POTEJ_HUMAN	POTE ankyrin domain family member J	191	118740	16.4	5.66	488.752	975.489	2	975.441	0.0477	0	74.34	AGFAGDDAPR
								656.765	1967.27	3	1967.07	0.2006	0	38.02	VAPEEHPILLTEAPLNPK
								506.254	1515.74	3	1515.7	0.046	0	33.39	QEYDESGPSIVHR
								702.027	2103.06	3	2103.02	0.0363	1	14.73	DFLHENSMLREEIAMLR
								773.137	2316.39	3	2316.05	0.3368	0	4.61	DLYTNTVLSGGTTMYPGMAHR	2 Oxidation (M)
								488.135	974.256	2	974.431	-0.1742	0	4.15	GSENSQPEK
								760.008	2277	3	2277.19	-0.1855	1	1.79	MVAEVDSMPAASSVKKPFVLR	Oxidation (M)
								790.7	1579.38	2	1579.78	-0.3925	1	1.73	MQKEIAALAPSMMK	2 Oxidation (M)
								989.114	1976.21	2	1975.95	0.2617	1	1.16	QMLKISSENSNPEQDLK	Oxidation (M)
								769.352	1536.69	2	1536.72	-0.0277	0	1.05	MVAEVDSMPAASSVK	Oxidation (M)
								1016.59	2031.16	2	2030.92	0.2347	1	1.02	GSENSQPEKMSQEPEINK
								624.395	1870.16	3	1869.8	0.3631	1	0.49	GSGKSNVGTSGDQDDSTMK
								723.854	1445.69	2	1445.77	-0.0804	1	0.44	EIAALAPSMMKIR	Oxidation (M)
	Q9BYX7	ACTBM_HUMAN	Putative beta-actin-like protein 3	117	42331	24.8	5.91	599.306	1196.6	2	1196.54	0.0552	0	58.57	GGSISGGGYGSGGGK
								616.825	1231.64	2	1231.59	0.0449	0	56.45	SGGGGGGGLGSGGSIR
								590.315	1178.62	2	1178.59	0.0228	0	36.77	YEELQITAGR
								738.339	1474.66	2	1474.78	-0.1146	0	25.58	FLEQQNQVLQTK	3 Oxidation (M)
								390.21	778.405	2	778.372	0.0328	0	20.94	AAFGGSGGR
								618.337	1234.66	2	1234.52	0.1387	0	12.55	FSSSSGYGGGSSR
								517.265	1032.52	2	1032.51	0.0064	0	9.14	TLLEGEESR
								533.269	1064.52	2	1064.51	0.0105	0	8.98	AQYEDIAQK
								656.796	1967.37	3	1967.07	0.2936	0	8.65	VAPEEHPILLTEAPLNPK
								797.737	796.73	1	796.346	0.3834	0	8.51	GGSGGSYGR
								628.392	627.385	1	627.37	0.0145	0	4.43	LPGVSR
								633.36	1264.71	2	1264.63	0.0761	0	2.19	TNAENEFVTIK
								890.652	2668.93	3	2669.29	-0.3601	1	1.33	DLYTNTVLSGGTTMYPGIAHRMQK
								890.761	2669.26	3	2669.22	0.0441	1	0.46	GMLTLKYPMEHGIITNWDDMEK
5146	SSBP_HUMAN	Q04837	Single-stranded DNA-binding protein, mitochondrial	381	17249	59.5	9.59	806.396	1610.78	2	1610.74	0.0345	0	94.66	SGDSEVYQLGDVSQK
								442.275	882.536	2	882.492	0.0436	0	57.28	VGQDPVLR	Oxidation (M)
								664.706	1991.1	3	1991.06	0.0394	0	44.46	QATTIIADNIIFLSDQTK
								493.262	984.51	2	984.492	0.0182	0	43.19	DVAYQYVK
								361.727	721.44	2	721.401	0.0388	0	29.01	IYLEGK
								348.936	1043.79	3	1043.62	0.1621	0	27.14	ISVFRPGLR
								350.709	699.404	2	699.345	0.0591	0	21.16	TTWHR
								347.755	693.495	2	693.429	0.0662	0	19.54	VHLLGR
								544.917	1631.73	3	1631.72	0.0034	1	10.11	IDYGEYMDKNNVR
	MRO2B_HUMAN	Q7Z745	Maestro heat-like repeat-containing protein family member 2B	43	182090	3.2	5.9	442.785	883.555	2	883.586	-0.0302	0	42.89	VGILTLLR
								489.375	976.736	2	976.458	0.2782	0	5.83	CLQAQAMR
5152	P60709	ACTB_HUMAN	Actin, cytoplasmic 1	81	42052	37.3	5.29	566.75	1131.49	2	1131.52	-0.0345	0	54.77	GYSFTTTAER
								895.94	1789.87	2	1789.88	-0.0183	0	45.44	SYELPDGQVITIGNER
								589.327	1176.64	2	1176.61	0.0339	0	36.47	EITALAPSTMK	Oxidation (M)
								581.308	1160.6	2	1160.61	-0.0089	0	31.3	EITALAPSTMK
								453.275	904.536	2	904.444	0.0921	1	21.86	CDVDIRK
								462.333	922.652	2	922.56	0.0918	1	15.04	IIAPPERK
								506.268	1515.78	3	1515.7	0.0877	0	13.65	QEYDESGPSIVHR
								488.831	975.647	2	975.441	0.2064	0	13.42	AGFAGDDAPR
								499.863	997.712	2	997.479	0.2327	0	13.21	DLTDYLMK
								863.389	2587.15	3	2587.3	-0.1537	1	8.27	GILTLKYPIEHGIVTNWDDMEK	Oxidation (M)
								516.894	1547.66	3	1547.81	-0.1464	1	4.96	MQKEITALAPSTMK
								878.81	2633.41	3	2633.25	0.1605	1	3.67	DLYANTVLSGGTTMYPGIADRMQK	2 Oxidation (M)
								391.093	1170.26	3	1170.56	-0.3078	0	1.42	HQGVMVGMGQK
	P35232	PHB_HUMAN	Prohibitin	74	29843	17.3	5.57	531.282	1060.55	2	1060.54	0.0093	0	51.83	AAIISAEGDSK
								529.8	1057.59	2	1057.52	0.07	0	43.92	QVAQQEAER
								593.343	1184.67	2	1184.65	0.0197	0	42.23	DLQNVNITLR
								928.197	1854.38	2	1854.03	0.3533	0	1.78	NITYLPAGQSVLLQLPQ
	P68133	ACTS_HUMAN	Actin, alpha skeletal muscle	53	42366	29.7	5.23	895.94	1789.87	2	1789.88	-0.0183	0	45.44	SYELPDGQVITIGNER
								589.327	1176.64	2	1176.61	0.0339	0	36.47	EITALAPSTMK	Oxidation (M)
								462.333	922.652	2	922.56	0.0918	1	15.04	IIAPPERK
								488.831	975.647	2	975.441	0.2064	0	13.42	AGFAGDDAPR
								499.863	997.712	2	997.479	0.2327	0	13.21	DLTDYLMK
								398.263	794.511	2	794.465	0.0464	0	10.32	IIAPPER
								516.894	1547.66	3	1547.81	-0.1464	1	4.96	MQKEITALAPSTMK
								792.099	2373.28	3	2373.11	0.1664	1	2.85	KDLYANNVMSGGTTMYPGIADR
								391.093	1170.26	3	1170.56	-0.3078	0	1.42	HQGVMVGMGQK
								878.018	2631.03	3	2631.34	-0.3093	0	0.07	YSVWIGGSILASLSTFQQMWITK	Oxidation (M)
	Q562R1	ACTBL_HUMAN	Beta-actin-like protein 2	45	42318	23.9	5.39	895.94	1789.87	2	1789.88	-0.0183	0	45.44	SYELPDGQVITIGNER
								453.275	904.536	2	904.444	0.0921	1	21.86	CDVDIRK
								462.333	922.652	2	922.56	0.0918	1	15.04	IIAPPERK
								499.863	997.712	2	997.479	0.2327	0	13.21	DLTDYLMK
								398.263	794.511	2	794.465	0.0464	0	10.32	IIAPPER
								618.029	617.022	1	617.338	-0.3168	1	7.21	DVKEK
								482.214	1443.62	3	1443.84	-0.2174	1	3.88	EIITLAPSTMKIK
								854.176	2559.51	3	2559.27	0.2371	1	2.64	GVLTLKYPIEHGVVTNWDDMEK	Oxidation (M)
								391.093	1170.26	3	1170.56	-0.3078	0	1.42	HQGVMVGMGQK
	Q6S8J3	POTEE_HUMAN	POTE ankyrin domain family member E	45	122882	7.4	5.83	895.94	1789.87	2	1789.88	-0.0183	0	45.44	SYELPDGQVITIGNER
								506.268	1515.78	3	1515.7	0.0877	0	13.65	QEYDESGPSIVHR
								488.831	975.647	2	975.441	0.2064	0	13.42	AGFAGDDAPR
								466.724	931.432	2	931.56	-0.128	1	10.89	KPFGLRSK
								760.857	2279.55	3	2279.17	0.3838	1	1.54	MVVEVDSMPAASSVKKPFGLR	2 Oxidation (M)
								626.268	1875.78	3	1875.84	-0.0561	1	0.75	SNVGASGDHDDSAMKTLR	Oxidation (M)
	Q8NC42	RN149_HUMAN	E3 ubiquitin-protein ligase RNF149	33	43707	7.3	6.08	592.822	1183.63	2	1183.69	-0.0622	1	32.58	GREILELVQK
								912.144	911.137	1	911.417	-0.2804	1	8.43	GGCTFKDK
								881.019	1760.02	2	1759.92	0.1036	1	0.33	GAAPWVALVARGGCTFK
5167	O75947	ATP5H_HUMAN	ATP synthase subunit d, mitochondrial	167	18537	39.8	5.21	583.806	1165.6	2	1165.54	0.0535	0	64.78	SCAEWVSLSK
								497.272	992.53	2	992.481	0.0485	0	62.92	AGLVDDFEK
								547.296	1092.58	2	1092.52	0.0576	0	47.19	SWNETLTSR
								392.266	782.517	2	782.417	0.0994	0	24.67	VPVPEDK
								966.525	1931.04	2	1930.98	0.0525	0	22.45	LAALPENPPAIDWAYYK
								390.741	779.468	2	779.407	0.0616	0	22.26	IVEYEK
								438.575	1312.7	3	1312.62	0.0826	1	10.62	IVEYEKEMEK	Oxidation (M)
								504.288	1006.56	2	1006.54	0.016	1	7.94	ARIVEYEK
	P60709	ACTB_HUMAN	Actin, cytoplasmic 1	46	42052	18.1	5.29	488.785	975.555	2	975.441	0.114	0	40.32	AGFAGDDAPR
								566.816	1131.62	2	1131.52	0.0977	0	33.73	GYSFTTTAER
								910.697	2729.07	3	2729.43	-0.3557	1	4.66	KYSVWIGGSILASLSTFQQMWISK
								878.728	2633.16	3	2633.25	-0.0846	1	0.8	DLYANTVLSGGTTMYPGIADRMQK	2 Oxidation (M)
	P62736	ACTA_HUMAN	Actin, aortic smooth muscle	40	42381	18	5.23	488.785	975.555	2	975.441	0.114	0	40.32	AGFAGDDAPR
								565.838	1129.66	2	1129.54	0.1215	0	4.75	GYSFVTTAER
								910.697	2729.07	3	2729.43	-0.3557	1	4.66	KYSVWIGGSILASLSTFQQMWISK
								1308.3	2614.59	2	2614.25	0.3362	1	2.22	DLYANNVLSGGTTMYPGIADRMQK
	P0CG39	POTEJ_HUMAN	POTE ankyrin domain family member J	40	118740	8.3	5.66	488.785	975.555	2	975.441	0.114	0	40.32	AGFAGDDAPR
								776.639	775.632	1	775.39	0.242	1	5.06	EKQMPK	Oxidation (M)
								422.256	1263.75	3	1263.52	0.2294	0	4.69	QQGMMGGMHQK	2 Oxidation (M)
								810.368	2428.08	3	2428.15	-0.0686	1	1.99	KDLYTNTVLSGGTTMYPGMAHR	Oxidation (M)
								397.725	793.436	2	793.517	-0.0815	1	0.87	IIAPPKR
								516.291	1545.85	3	1545.74	0.1146	1	0.69	ERDFLHENSMLR
								643.411	1927.21	3	1926.86	0.352	1	0.04	SNVGTSGDQDDSTMKTLR	Oxidation (M)
	P68133	ACTS_HUMAN	Actin, alpha skeletal muscle	40	42366	11.7	5.23	488.785	975.555	2	975.441	0.114	0	40.32	AGFAGDDAPR
								565.838	1129.66	2	1129.54	0.1215	0	4.75	GYSFVTTAER
								888.942	2663.81	3	2664.2	-0.3927	1	3.1	DLYANNVMSGGTTMYPGIADRMQK	2 Oxidation (M)
5188	P02545	LMNA_HUMAN	Prelamin-A/C	125	74380	15.1	6.57	574.81	1147.6	2	1147.57	0.0326	0	58.58	ITESEEVVSR
								680.389	1358.76	2	1358.68	0.0837	0	47.39	SGAQASSTPLSPTR
								522.304	1042.59	2	1042.54	0.0525	0	41.02	EGDLIAAQAR
								516.896	1031.78	2	1031.51	0.2705	0	11.8	QLQDEMLR
								583.29	1164.57	2	1164.54	0.0252	0	10.82	AAYEAELGDAR
								918.77	917.762	1	917.445	0.317	0	8.79	DLEDSLAR
								1051.99	2101.96	2	2102.11	-0.1544	1	6.35	DLEALLNSKEAALSTALSEK
								588.201	587.194	1	587.303	-0.1091	0	4.5	LDNAR
								1104.69	1103.68	1	1103.65	0.0374	1	0.69	LAVYIDRVR
								620.684	619.677	1	619.336	0.3403	0	0.06	LQTMK
	P38646	GRP75_HUMAN	Stress-70 protein, mitochondrial	38	73920	11.6	5.87	621.874	1241.73	2	1241.67	0.06	0	38.36	DAGQISGLNVLR
								780.007	779	1	779.312	-0.3123	0	7.71	EMAGDNK	Oxidation (M)
								927.41	1852.8	2	1852.8	0.0076	1	1.77	MEEFKDQLPADECNK
								802.856	2405.55	3	2405.19	0.3525	1	1.6	AMQDAEVSKSDIGEVILVGGMTR
								973.736	972.729	1	972.546	0.1821	1	0.54	ISASRAAAAR
								711.309	1420.6	2	1420.65	-0.047	1	0.01	DDIENMVKNAEK	Oxidation (M)
5192	O75489	NDUS3_HUMAN	NADH dehydrogenase [ubiquinone] iron-sulfur protein 3, mitochondrial	410	30337	33.7	6.99	462.751	923.488	2	923.435	0.0533	1	37.89	YDDEVKR
								455.227	908.44	2	908.414	0.0256	0	16.74	AANWYER
								480.768	959.522	2	959.446	0.0761	0	14.52	DHTNAQFK
								648.39	1294.77	2	1294.66	0.1101	0	58.13	DFPLSGYVELR
								462.599	1384.78	3	1384.76	0.0204	0	67.45	SLVDLTAVDVPTR
								743.918	1485.82	2	1485.78	0.0397	0	77.17	VVAEPVELAQEFR
								776.372	1550.73	2	1550.75	-0.0219	0	2.17	ILTDYGFEGHPFR
								950.493	1898.97	2	1898.95	0.0194	0	13.39	TYTDELTPIESAVSVFK
	P60709	ACTB_HUMAN	Actin, cytoplasmic 1	75	42052	32.8	5.29	566.781	1131.55	2	1131.52	0.028	0	57.81	GYSFTTTAER
								488.783	975.551	2	975.441	0.1104	0	38.86	AGFAGDDAPR
								499.782	997.55	2	997.479	0.0711	0	34.38	DLTDYLMK
								895.938	1789.86	2	1789.88	-0.024	0	30.03	SYELPDGQVITIGNER
								581.339	1160.66	2	1160.61	0.0515	0	22.59	EITALAPSTMK
								462.298	922.582	2	922.56	0.0221	1	16.52	IIAPPERK
								398.288	794.562	2	794.465	0.0968	0	14	IIAPPER
								516.93	1547.77	3	1547.81	-0.0359	1	1.36	MQKEITALAPSTMK
								878.762	2633.26	3	2633.25	0.0181	1	0.96	DLYANTVLSGGTTMYPGIADRMQK	2 Oxidation (M)
								586.259	1170.5	2	1170.56	-0.0605	0	0.93	HQGVMVGMGQK
								961.984	2882.93	3	2883.25	-0.3159	1	0.74	MDDDIAALVVDNGSGMCKAGFAGDDAPR	Oxidation (M)
								400.932	799.849	2	799.528	0.321	1	0.04	RGILTLK
	P07355	ANXA2_HUMAN	Annexin A2	50	38808	16.5	7.57	622.854	1243.69	2	1243.62	0.0772	0	50.22	TNQELQEINR
								771.927	1541.84	2	1541.84	-0.0027	0	20.34	GVDEVTIVNILTNR
								440.742	879.469	2	879.434	0.0356	0	5.79	DLYDAGVK
								772.565	771.558	1	771.347	0.2103	0	4.24	LYDSMK	Oxidation (M)
								556.286	1110.56	2	1110.55	0.0114	0	3.67	QDIAFAYQR
								479.915	957.815	2	957.579	0.2358	1	1.35	LMVALAKGR
	A6NMY6	AXA2L_HUMAN	Putative annexin A2-like protein	50	38806	9.7	6.49	622.854	1243.69	2	1243.62	0.0772	0	50.22	TNQELQEINR
								870.267	1738.52	2	1738.84	-0.3201	1	1.88	DNAQRQDIVFSYQR
								479.915	957.815	2	957.579	0.2358	1	1.35	LMVALAKGR
	P04792	HSPB1_HUMAN	Heat shock protein beta-1	49	22826	18	5.98	582.378	1162.74	2	1162.61	0.1287	0	48.73	LFDQAFGLPR
								471.319	940.623	2	940.498	0.1254	0	15.02	AQLGGPEAAK
								953.456	1904.9	2	1904.98	-0.0861	0	3.04	LATQSNEITIPVTFESR
	P68133	ACTS_HUMAN	Actin, alpha skeletal muscle	48	42366	27.3	5.23	488.783	975.551	2	975.441	0.1104	0	38.86	AGFAGDDAPR
								499.782	997.55	2	997.479	0.0711	0	34.38	DLTDYLMK
								895.938	1789.86	2	1789.88	-0.024	0	30.03	SYELPDGQVITIGNER
								581.339	1160.66	2	1160.61	0.0515	0	22.59	EITALAPSTMK
								462.298	922.582	2	922.56	0.0221	1	16.52	IIAPPERK
								398.288	794.562	2	794.465	0.0968	0	14	IIAPPER
								396.05	790.086	2	790.364	-0.2782	0	5.59	CDIDIR
								878.008	2631	3	2631.34	-0.3401	0	4.44	YSVWIGGSILASLSTFQQMWITK	Oxidation (M)
								516.93	1547.77	3	1547.81	-0.0359	1	1.36	MQKEITALAPSTMK
								586.259	1170.5	2	1170.56	-0.0605	0	0.93	HQGVMVGMGQK
								400.932	799.849	2	799.528	0.321	1	0.04	RGILTLK
	Q6S8J3	POTEE_HUMAN	POTE ankyrin domain family member E	44	122882	9	5.83	488.783	975.551	2	975.441	0.1104	0	38.86	AGFAGDDAPR
								895.938	1789.86	2	1789.88	-0.024	0	30.03	SYELPDGQVITIGNER
								825.542	1649.07	2	1648.85	0.2203	1	6.46	LDLAGRELPDYLMK	Oxidation (M)
								773.066	2316.18	3	2316.05	0.1256	0	3.09	DLYTNTVLSGGTTMYPGMAHR	2 Oxidation (M)
								776.497	775.49	1	775.39	0.1002	1	2.71	EKQMPK	Oxidation (M)
								532.893	1595.66	3	1595.77	-0.114	1	1.68	MQKEIAALAPSMMK	3 Oxidation (M)
								554.305	1106.59	2	1106.53	0.0668	0	0.81	MSQELEINK	Oxidation (M)
								400.932	799.849	2	799.528	0.321	1	0.04	RGILTLK
	P0CG38	POTEI_HUMAN	POTE ankyrin domain family member I	40	122858	5.3	5.83	488.783	975.551	2	975.441	0.1104	0	38.86	AGFAGDDAPR
								477.056	1428.14	3	1427.82	0.328	1	5.27	EIAALAPSMLKIR	Oxidation (M)
								773.066	2316.18	3	2316.05	0.1256	0	3.09	DLYTNTVLSGGTTMYPGMAHR	2 Oxidation (M)
								776.497	775.49	1	775.39	0.1002	1	2.71	EKQMPK	Oxidation (M)
								400.932	799.849	2	799.528	0.321	1	0.04	RGILTLK
	P0CG39	POTEJ_HUMAN	POTE ankyrin domain family member J	40	118740	7.2	5.66	488.783	975.551	2	975.441	0.1104	0	38.86	AGFAGDDAPR
								773.066	2316.18	3	2316.05	0.1256	0	3.09	DLYTNTVLSGGTTMYPGMAHR	2 Oxidation (M)
								776.497	775.49	1	775.39	0.1002	1	2.71	EKQMPK	Oxidation (M)
								532.893	1595.66	3	1595.77	-0.114	1	1.68	MQKEIAALAPSMMK	3 Oxidation (M)
								702.108	2103.3	3	2103.02	0.2776	1	1.41	DFLHENSMLREEIAMLR
								400.932	799.849	2	799.528	0.321	1	0.04	RGILTLK
	P07686	HEXB_HUMAN	Beta-hexosaminidase subunit beta	37	63527	5.2	6.29	550.41	1098.81	2	1098.66	0.1413	0	37.02	VLDIIATINK
								449.267	896.52	2	896.443	0.0777	0	5.73	MVIEYAR	Oxidation (M)
								430.946	1289.82	3	1289.67	0.1435	1	3.58	ASAVGERLWSSK
	Q562R1	ACTBL_HUMAN	Beta-actin-like protein 2	36	42318	21	5.39	499.782	997.55	2	997.479	0.0711	0	34.38	DLTDYLMK
								895.938	1789.86	2	1789.88	-0.024	0	30.03	SYELPDGQVITIGNER
								462.298	922.582	2	922.56	0.0221	1	16.52	IIAPPERK
								854.215	2559.62	3	2559.27	0.3548	1	2.39	GVLTLKYPIEHGVVTNWDDMEK	Oxidation (M)
								586.259	1170.5	2	1170.56	-0.0605	0	0.93	HQGVMVGMGQK
								536.255	1605.74	3	1605.85	-0.1034	1	0.81	MQKEIITLAPSTMK	Oxidation (M)
	Q5JTC6	AMER1_HUMAN	APC membrane recruitment protein 1	34	125092	3.5	4.77	576.432	575.425	1	575.303	0.122	1	34.18	DGTKR
								484.88	967.745	2	967.516	0.2284	1	3.56	TAMKLFGGK	Oxidation (M)
								353.981	1058.92	3	1058.59	0.326	1	1.21	FPSMPKPKK
								911.77	1821.53	2	1821.85	-0.3275	0	0.24	GITSAFPTTASSEPDWR
	Q13185	CBX3_HUMAN	Chromobox protein homolog 3	34	20969	11.5	5.23	576.432	575.425	1	575.303	0.122	1	34.18	DGTKR
5211	P25705	ATPA_HUMAN	ATP synthase subunit alpha, mitochondrial	42	59828	15	9.16	338.931	1013.77	3	1013.61	0.16	1	12.45	LIKEGDIVK
								340.837	1019.49	3	1019.51	-0.018	1	3.86	RLTDADAMK
								532.901	1063.79	2	1063.55	0.2349	1	6.58	AMKQVAGTMK	Oxidation (M)
								720.299	1438.58	2	1438.82	-0.2346	1	5.14	QMSLLLRRPPGR
								851.258	1700.5	2	1700.87	-0.3729	1	2.71	DNGKHALIIYDDLSK
								513.856	1025.7	2	1025.59	0.1111	0	41.7	AVDSLVPIGR
								408.311	814.607	2	814.455	0.1521	0	8.92	ELIIGDR
								864.77	863.763	1	863.406	0.3571	0	6.1	LTDADAMK
								432.891	1295.65	3	1295.64	0.0128	0	4.17	NFHASNTHLQK
5228	P63244	GBLP_HUMAN	Guanine nucleotide-binding protein subunit beta-2-like 1	245	35511	47.3	7.6	655.339	1308.66	2	1308.63	0.0317	0	68.18	DVLSVAFSSDNR
								530.318	1058.62	2	1058.59	0.0337	0	66.15	VWQVTIGTR
								632.885	1263.76	2	1263.65	0.1102	0	53.76	LWDLTTGTTTR
								545.831	1089.65	2	1089.56	0.0833	0	53.15	LWNTLGVCK
								596.807	1191.6	2	1191.55	0.0482	0	38.39	DETNYGIPQR
								502.792	1003.57	2	1003.49	0.078	0	35.48	VWNLANCK
								683.902	1365.79	2	1365.68	0.1145	0	35.09	YWLCAATGPSIK
								746.868	1491.72	2	1491.67	0.0555	0	34.31	DGQAMLWDLNEGK	Oxidation (M)
								430.811	859.608	2	859.444	0.164	0	25.19	IWDLEGK
								415.303	828.592	2	828.496	0.0969	0	21.87	IIVDELK
								661.379	1981.12	3	1980.86	0.2529	0	16.23	YTVQDESHSEWVSCVR
								597.028	1788.06	3	1787.99	0.0735	1	9.74	IIVDELKQEVISTSSK
								489.781	977.547	2	977.503	0.0439	0	2.4	QEVISTSSK
								915.205	2742.59	3	2742.3	0.2902	0	1.7	TNHIGHTGYLNTVTVSPDGSLCASGGK
	P35914	HMGCL_HUMAN	Hydroxymethylglutaryl-CoA lyase, mitochondrial	46	34794	10.2	8.81	508.767	1015.52	2	1015.54	-0.0215	0	45.85	AAQSANISVR
								498.834	995.653	2	995.613	0.0399	1	2.05	VKIVEVGPR
								520.849	1559.52	3	1559.67	-0.1509	0	1.77	GYVSCALGCPYEGK
	Q9UMR3	TBX20_HUMAN	T-box transcription factor TBX20	43	49372	20.1	7.29	460.771	919.528	2	919.506	0.0215	1	43.35	RMFPTIR
								797.757	1593.5	2	1593.78	-0.2831	0	5.65	MEFTASPKPQLSSR	Oxidation (M)
								892.746	1783.48	2	1783.88	-0.3989	1	2.68	ANAFSIAALMSSGGSKEK	Oxidation (M)
								840.938	2519.79	3	2520.17	-0.38	1	0.73	SPIRTYGGEEDVLGDESQTTPNR
								978.706	2933.1	3	2933.39	-0.2914	0	0.4	LGMPLTPSAIASSMQGSGPTFPSFHMPR	2 Oxidation (M)
5252	P04406	G3P_HUMAN	Glyceraldehyde-3-phosphate dehydrogenase	506	36201	39.1	8.57	765.949	1529.88	2	1529.79	0.0968	0	108.48	VPTANVSVVDLTCR
								917.484	1832.95	2	1832.91	0.0414	0	64.09	IISNASCTTNCLAPLAK
								706.433	1410.85	2	1410.78	0.068	0	54.25	GALQNIIPASTGAAK
								511.017	1530.03	3	1529.79	0.2419	0	39.76	VPTANVSVVDLTCR
								406.241	810.467	2	810.406	0.0615	0	38.15	LTGMAFR	Oxidation (M)
								601.352	1200.69	2	1200.6	0.0894	0	31.63	VVDLMAHMASK
								370.199	738.384	2	738.355	0.0287	0	31.06	YDNSLK
								882.422	1762.83	2	1762.8	0.0348	0	28.56	LISWYDNEFGYSNR
								415.252	828.489	2	828.434	0.0547	0	24.74	QASEGPLK
								391.235	780.456	2	780.402	0.0539	1	17.03	YDDIKK
								743.736	2228.19	3	2228.1	0.0895	0	15.42	VIISAPSADAPMFVMGVNHEK	Oxidation (M)
								355.872	1064.59	3	1064.58	0.009	1	12.99	AGAHLQGGAKR
								882.433	1762.85	2	1762.8	0.057	0	9.89	LISWYDNEFGYSNR
	P07355	ANXA2_HUMAN	Annexin A2	47	38808	26.3	7.57	544.308	1086.6	2	1086.59	0.0098	0	45.63	DALNIETAIK
								622.884	1243.75	2	1243.62	0.1382	0	30.53	TNQELQEINR
								711.327	1420.64	2	1420.69	-0.0489	0	15.45	SLYYYIQQDTK
								615.663	1843.97	3	1843.9	0.0724	0	7.8	LSLEGDHSTPPSAYGSVK
								440.779	879.542	2	879.434	0.1086	0	4.68	DLYDAGVK
								952.195	2853.56	3	2853.55	0.0151	1	3.26	SALSGHLETVILGLLKTPAQYDASELK
								610.335	609.327	1	609.276	0.0515	0	2.72	GDYQK
	P45880	VDAC2_HUMAN	Voltage-dependent anion-selective channel protein 2	46	32060	7.5	7.49	508.829	1015.64	2	1015.59	0.0531	0	44.67	LTLSALVDGK
								647.353	1292.69	2	1292.66	0.0304	0	15.43	YQLDPTASISAK
	O14556	G3PT_HUMAN	Glyceraldehyde-3-phosphate dehydrogenase, testis-specific	39	44815	14.2	8.38	406.241	810.467	2	810.406	0.0615	0	38.15	LTGMAFR	Oxidation (M)
								712.864	2135.57	3	2135.18	0.3923	0	5.79	EEIKPPPPPLPPHPATPPPK
								786.302	2355.89	3	2356.15	-0.2631	1	4.12	NGQLVVDNHEISVYQCKEPK
								472.326	1413.96	3	1413.74	0.2121	1	0.79	VVDLLRYMFSR	Oxidation (M)
5321	P14618	KPYM_HUMAN	Pyruvate kinase isozymes M1/M2	64	58470	14.3	7.96	680.389	1358.76	2	1358.7	0.0653	0	45.95	NTGIICTIGPASR
								599.342	1196.67	2	1196.64	0.0291	0	39.46	LDIDSPPITAR
								571.33	1140.65	2	1140.6	0.0435	0	38.64	GDLGIEIPAEK
								477.328	952.641	2	952.473	0.1685	0	29.47	IENHEGVR
								367.715	733.416	2	733.354	0.0621	0	28.86	SGMNVAR
								353.247	704.48	2	704.422	0.058	0	8.46	VFLAQK
								769.85	2306.53	3	2306.14	0.3912	1	2.99	CNRAGKPVICATQMLESMIK
	Q8IV08	PLD3_HUMAN	Phospholipase D3	57	55127	2	6.02	542.847	1083.68	2	1083.6	0.0755	0	56.58	ALLNVVDNAR
	Q9UI33	SCNBA_HUMAN	Sodium channel protein type 11 subunit alpha	34	207696	2	8.32	545.769	1089.52	2	1089.55	-0.0247	0	34.3	EALVAMGIDR	Oxidation (M)
								353.247	704.48	2	704.458	0.0216	1	16.05	VFKLAK
								944.787	943.78	1	943.497	0.2826	0	5.68	NVAAEIEAK
								610.847	1219.68	2	1219.62	0.0613	0	1.95	DIIPLVMEMK	2 Oxidation (M)
	Q9Y6D5	BIG2_HUMAN	Brefeldin A-inhibited guanine nucleotide-exchange protein 2	33	204418	6.8	5.93	712.822	2135.44	3	2135.05	0.3888	1	32.74	MFSLQKIVEISYYNMNR
								520.892	1559.65	3	1559.83	-0.1737	1	11.92	DFLRPFEHIMKK
								938.4	937.392	1	937.462	-0.0694	0	2.16	HGLTEPER
								1006.68	1005.67	1	1005.52	0.1455	0	2.08	DAYVQALAR
								352.891	1055.65	3	1055.54	0.1078	0	1.96	ALMEAVSHAK
								797.706	2390.1	3	2390.16	-0.0665	1	1.91	ANFIEADKYFLPFELACQSK
								822.003	1641.99	2	1641.87	0.1178	1	1.78	LGTAAPPKANFIEADK
								843.782	842.774	1	842.472	0.3023	1	1.74	NRSPTIR
								1073.77	3218.3	3	3218.55	-0.2527	1	0.11	QMASFQESVGETSSQSVVVAVDRIFTGSTR	Oxidation (M)
5324	P49411	EFTU_HUMAN	Elongation factor Tu, mitochondrial	40	49852	13.7	7.26	516.842	1031.67	2	1031.56	0.108	0	40.62	GTVVTGTLER
								593.361	1184.71	2	1184.61	0.0918	0	22.36	AEAGDNLGALVR
								460.321	918.628	2	918.539	0.0891	0	15.09	TTLTAAITK
								408.229	814.443	2	814.455	-0.0118	0	14.33	ILAEGGGAK
								924.799	2771.38	3	2771.25	0.1271	0	1.61	HKPFVSHFMPVMFSLTWDMACR	3 Oxidation (M)
	P12036	NFH_HUMAN	Neurofilament heavy polypeptide	33	112639	7.6	5.99	503.267	1004.52	2	1004.46	0.06	0	32.67	LLEGEECR
								430.33	858.645	2	858.445	0.2009	1	17.73	AEAKSPEK
								450.328	1347.96	3	1347.68	0.2793	1	4.78	DALKCDVTSALR
								516.902	1031.79	2	1031.5	0.2908	1	1.65	QRSELEDR
								582.846	1163.68	2	1163.58	0.0997	0	1.65	TSVSSVSASPSR
								360.761	719.508	2	719.297	0.211	0	1.47	EEAEDK
								448.864	1343.57	3	1343.66	-0.0855	1	1.34	DSKPPEKATEDK
								629.325	1256.64	2	1256.65	-0.0114	1	0.41	EEAEAAARALAR
5348	P02545	LMNA_HUMAN	Prelamin-A/C	444	74380	27.3	6.57	583.284	1164.55	2	1164.54	0.0118	0	87.23	AAYEAELGDAR
								680.352	1358.69	2	1358.68	0.0109	0	70.46	SGAQASSTPLSPTR
								574.808	1147.6	2	1147.57	0.0295	0	67.43	ITESEEVVSR
								715.953	1429.89	2	1429.78	0.1142	0	66.51	IDSLSAQLSQLQK
								545.308	1088.6	2	1088.55	0.0544	0	65.94	SLETENAGLR
								560.339	1118.66	2	1118.58	0.0813	0	61.64	EAALSTALSEK
								451.256	900.498	2	900.492	0.0063	0	52.57	LEAALGEAK
								425.238	848.461	2	848.476	-0.015	0	34.52	LAVYIDR
								594.334	1186.65	2	1186.63	0.022	1	31.72	LRDLEDSLAR
								522.318	1042.62	2	1042.54	0.0808	0	27.1	EGDLIAAQAR
								514.77	1027.52	2	1027.57	-0.0415	0	17.34	LADALQELR
								509.25	1524.73	3	1524.75	-0.0208	1	17.32	LQTMKEELDFQK	Oxidation (M)
								815.397	1628.78	2	1628.8	-0.0213	1	14.18	LQEKEDLQELNDR
								415.785	829.556	2	829.491	0.0646	0	4.64	LQLELSK
								431.906	1292.7	3	1292.64	0.0596	1	1.97	AAYEAELGDARK
								512.293	1022.57	2	1022.5	0.0688	0	1.15	NIYSEELR
								598.83	1793.47	3	1793.8	-0.3309	1	0.47	NKSNEDQSMGNWQIK	Oxidation (M)
	P12429	ANXA3_HUMAN	Annexin A3	158	36524	21.7	5.63	537.321	1072.63	2	1072.58	0.0519	0	49.49	SEIDLLDIR
								721.386	1440.76	2	1440.7	0.0591	0	64.51	SDTSGDYEITLLK
								793.381	1584.75	2	1584.69	0.0562	0	69.74	SLGDDISSETSGDFR
								837.471	1672.93	2	1672.86	0.0653	0	36.13	GAGTNEDALIEILTTR
								571.929	1712.77	3	1712.79	-0.0193	1	23.29	SLGDDISSETSGDFRK
								891.447	1780.88	2	1780.82	0.0646	0	40.05	DYPDFSPSVDAEAIQK
	P82650	RT22_HUMAN	28S ribosomal protein S22, mitochondrial	66	41425	7.5	7.7	586.29	1170.57	2	1170.62	-0.0589	0	65.72	DQAAEGINLIK
								496.294	990.574	2	990.523	0.0504	0	15.45	ILEGTETTK
								864.703	863.696	1	863.486	0.2091	1	1.64	GKYDLLR
	Q6BDS2	URFB1_HUMAN	UHRF1-binding protein 1	41	160582	2.9	5.75	514.825	1027.63	2	1027.6	0.032	1	40.63	EKLLQEIR
								414.133	1239.38	3	1239.61	-0.2344	0	8.34	LMGGAMQLTFR	Oxidation (M)
								936.721	2807.14	3	2807.39	-0.244	1	3.2	MEKWHEETGLKPPWHLGVDSLFR	Oxidation (M)
	Q6NXR0	IIGP5_HUMAN	Interferon-inducible GTPase 5	39	50599	4.3	5.22	514.825	1027.63	2	1027.57	0.0684	0	38.89	EAAVLQEIR
								406.97	1217.89	3	1217.63	0.2626	1	1.6	TKVDEDLAATR
	Q8IV08	PLD3_HUMAN	Phospholipase D3	36	55127	3.3	6.02	542.87	1083.73	2	1083.6	0.1215	0	36.41	ALLNVVDNAR
								375.996	749.978	2	750.34	-0.3625	0	2.28	MVDMQK
5416	P02545	LMNA_HUMAN	Prelamin-A/C	587	74380	34.8	6.57	583.305	1164.6	2	1164.54	0.0543	0	88.11	AAYEAELGDAR
								574.822	1147.63	2	1147.57	0.0576	0	77.49	ITESEEVVSR
								514.829	1027.64	2	1027.57	0.0781	0	75.45	LADALQELR
								522.294	1042.57	2	1042.54	0.0322	0	71.98	EGDLIAAQAR
								560.342	1118.67	2	1118.58	0.0878	0	69.51	EAALSTALSEK
								622.441	1242.87	2	1242.72	0.1499	1	69.2	LKDLEALLNSK
								680.367	1358.72	2	1358.68	0.0415	0	67.71	SGAQASSTPLSPTR
								715.938	1429.86	2	1429.78	0.0846	0	57.92	IDSLSAQLSQLQK
								594.338	1186.66	2	1186.63	0.0302	1	49.89	LRDLEDSLAR
								585.031	1752.07	3	1751.86	0.2169	0	48.95	NSNLVGAAHEELQQSR
								451.236	900.457	2	900.492	-0.0344	0	48.5	LEAALGEAK
								815.454	1628.89	2	1628.8	0.0932	1	43.74	LQEKEDLQELNDR
								545.299	1088.58	2	1088.55	0.0378	0	41.5	SLETENAGLR
								425.288	848.561	2	848.476	0.0857	0	36.2	LAVYIDR
								449.943	1346.81	3	1346.67	0.1419	0	31.6	LALDMEIHAYR	Oxidation (M)
								415.786	829.558	2	829.491	0.0669	0	30.2	LQLELSK
								392.864	1175.57	3	1175.6	-0.0262	1	29.8	KQLQDEMLR	Oxidation (M)
								431.917	1292.73	3	1292.64	0.0932	1	21.37	AAYEAELGDARK
								503.96	1508.86	3	1508.75	0.1028	1	20.84	LQTMKEELDFQK
								512.292	1022.57	2	1022.5	0.0659	0	15.86	NIYSEELR
								637.303	1908.89	3	1908.91	-0.0257	0	14.95	MQQQLDEYQELLDIK	Oxidation (M)
								567.365	1699.07	3	1698.96	0.1111	1	6.46	IRIDSLSAQLSQLQK
	P60709	ACTB_HUMAN	Actin, cytoplasmic 1	123	42052	30.1	5.29	488.771	975.527	2	975.441	0.0862	0	57.42	AGFAGDDAPR
								566.78	1131.54	2	1131.52	0.0253	0	50.21	GYSFTTTAER
								850.769	2549.29	3	2549.17	0.12	0	43.81	LCYVALDFEQEMATAASSSSLEK
								581.342	1160.67	2	1160.61	0.0588	0	34.57	EITALAPSTMK
								652.063	1953.17	3	1953.06	0.1088	0	30.23	VAPEEHPVLLTEAPLNPK
								398.255	794.495	2	794.465	0.0304	0	17.54	IIAPPER
								506.26	1515.76	3	1515.7	0.062	0	10.97	QEYDESGPSIVHR
								744.395	2230.16	3	2230.06	0.1056	0	1.74	DLYANTVLSGGTTMYPGIADR	Oxidation (M)
	Q6S8J3	POTEE_HUMAN	POTE ankyrin domain family member E	80	122882	8	5.83	488.771	975.527	2	975.441	0.0862	0	57.42	AGFAGDDAPR
								850.769	2549.29	3	2549.17	0.12	0	43.81	LCYVALDFEQEMATAASSSSLEK
								506.26	1515.76	3	1515.7	0.062	0	10.97	QEYDESGPSIVHR
								1266.21	3795.6	3	3795.74	-0.1396	1	5.97	ALQLNELTMDDDTAVLVIDNGSGMCKAGFAGDDAPR	Oxidation (M)
	P62736	ACTA_HUMAN	Actin, aortic smooth muscle	70	42381	18.8	5.23	488.771	975.527	2	975.441	0.0862	0	57.42	AGFAGDDAPR
								581.342	1160.67	2	1160.61	0.0588	0	34.57	EITALAPSTMK
								398.255	794.495	2	794.465	0.0304	0	17.54	IIAPPER
								750.85	1499.69	2	1499.7	-0.0154	0	5.34	QEYDEAGPSIVHR
								1169.8	3506.38	3	3506.63	-0.2493	1	3.36	FRCPETLFQPSFIGMESAGIHETTYNSIMK	Oxidation (M)
	A5A3E0	POTEF_HUMAN	POTE ankyrin domain family member F	57	123020	8	5.83	488.771	975.527	2	975.441	0.0862	0	57.42	AGFAGDDAPR
								865.436	2593.29	3	2593.19	0.0931	0	11.55	LCYVALDFEQEMATVASSSSLEK	Oxidation (M)
								506.26	1515.76	3	1515.7	0.062	0	10.97	QEYDESGPSIVHR
								1266.21	3795.6	3	3795.74	-0.1396	1	5.97	ALQLNELTMDDDTAVLVIDNGSGMCKAGFAGDDAPR	Oxidation (M)
	P0CG38	POTEI_HUMAN	POTE ankyrin domain family member I	57	122858	6.7	5.83	488.771	975.527	2	975.441	0.0862	0	57.42	AGFAGDDAPR
								506.26	1515.76	3	1515.7	0.062	0	10.97	QEYDESGPSIVHR
								1266.21	3795.6	3	3795.74	-0.1396	1	5.97	ALQLNELTMDDDTAVLVIDNGSGMCKAGFAGDDAPR	Oxidation (M)
								871.438	2611.29	3	2611.15	0.1415	0	3.03	LCYVALDFEQEMAMAASSSSLEK	2 Oxidation (M)
	P22626	ROA2_HUMAN	Heterogeneous nuclear ribonucleoproteins A2/B1	34	37464	19.5	8.97	740.735	2219.18	3	2219.06	0.1194	1	34.19	DYFEEYGKIDTIEIITDR
								989.96	2966.86	3	2967.23	-0.3763	1	5.17	SGNFGGSRNMGGPYGGGNYGPGGSGGSGGYGGR	Oxidation (M)
								547.005	545.998	1	546.312	-0.3146	1	4.08	QSGKK
								446.96	1337.86	3	1337.69	0.163	0	0.07	EESGKPGAHVTVK
	Q6NXR0	IIGP5_HUMAN	Interferon-inducible GTPase 5	33	50599	5.6	5.22	514.829	1027.64	2	1027.57	0.0781	0	32.91	EAAVLQEIR
								437.101	872.187	2	872.508	-0.3209	0	3.74	SSLINALR
								354	1058.98	3	1058.58	0.3986	0	1	AMLQEQVLK
5520	Q9Y265	RUVB1_HUMAN	RuvB-like 1	371	50538	40.1	6.02	462.644	1384.91	3	1384.79	0.1173	0	71.17	TALALAIAQELGSK
								615.812	1229.61	2	1229.67	-0.0589	0	63.05	EACGVIVELIK
								638.89	1275.77	2	1275.67	0.0945	0	59.55	LDPSIFESLQK
								765.999	1529.98	2	1529.88	0.1023	0	51.52	YSVQLLTPANLLAK
								563.383	1687.13	3	1686.93	0.1977	0	50.36	ALESSIAPIVIFASNR
								530.332	1058.65	2	1058.56	0.0884	0	48.56	GLGLDESGLAK
								540.858	1079.7	2	1079.67	0.0309	0	45.3	TISHVIIGLK
								867.774	1733.53	2	1733.88	-0.3498	0	41.31	VEAGDVIYIEANSGAVK
								650.391	1948.15	3	1947.99	0.1616	0	38.74	GTEDITSPHGIPLDLLDR
								540.839	1079.66	2	1079.63	0.0288	0	31.19	AVLLAGPPGTGK
								648.361	1942.06	3	1941.92	0.1403	0	25.65	VPFCPMVGSEVYSTEIK
								621.303	1240.59	2	1240.58	0.0083	0	24.17	TMLYTPQEMK
								775.471	2323.39	3	2323.17	0.2265	0	13	AQTEGINISEEALNHLGEIGTK
	Q8IV08	PLD3_HUMAN	Phospholipase D3	116	55127	8.4	6.02	537.912	1073.81	2	1073.66	0.1487	0	64.01	AFLLSLAALR
								538.846	1075.68	2	1075.6	0.0747	0	56.04	SQLEAIFLR
								542.839	1083.66	2	1083.6	0.0589	0	55.45	ALLNVVDNAR
								658.36	1314.71	2	1314.69	0.0128	0	25.35	LFVVPADEAQAR
5528	P63244	GBLP_HUMAN	Guanine nucleotide-binding protein subunit beta-2-like 1	30	35511	11.4	7.6	655.347	1308.68	2	1308.63	0.049	0	29.61	DVLSVAFSSDNR
								398.08	1191.22	3	1191.55	-0.3338	0	11.78	DETNYGIPQR
								688.332	687.324	1	687.37	-0.046	0	2.34	FVGHTK
								350.87	1049.59	3	1049.56	0.0311	1	1.68	DKTIIMWK	Oxidation (M)
	Q7Z7K0	COXM1_HUMAN	COX assembly mitochondrial protein homolog	27(score<33)	12823	21.7	8.89	814.913	1627.81	2	1627.84	-0.031	1	27.25	ALDPADQHLRHVEK
								917.872	916.865	1	916.505	0.36	1	6.75	LQKLPTSM
								422.879	1265.62	3	1265.62	-0.0022	0	0.04	MALDPADQHLR
5545	P14618	KPYM_HUMAN	Pyruvate kinase isozymes M1/M2	282	58470	27.3	7.96	680.393	1358.77	2	1358.7	0.0734	0	76.44	NTGIICTIGPASR
								367.701	733.388	2	733.354	0.0336	0	62.19	SGMNVAR
								510.308	1018.6	2	1018.51	0.0923	0	52.35	GDYPLEAVR
								599.361	1196.71	2	1196.64	0.0683	0	50.29	LDIDSPPITAR
								571.342	1140.67	2	1140.6	0.0663	0	45.8	GDLGIEIPAEK
								477.267	952.52	2	952.473	0.047	0	38.46	IENHEGVR
								359.217	716.419	2	716.407	0.0125	0	29.81	VVEVGSK
								420.801	839.588	2	839.523	0.0648	0	29.45	APIIAVTR
								456.736	911.457	2	911.446	0.0109	0	24.76	ASDVHEVR
								442.771	883.527	2	883.47	0.0573	0	22.65	MQHLIAR	Oxidation (M)
								353.245	704.476	2	704.422	0.0542	0	12.55	VFLAQK
								384.894	767.773	2	767.404	0.3688	0	11.23	SAHQVAR
								676.461	675.453	1	675.38	0.0732	0	9.18	SVETLK
								520.85	1039.69	2	1039.54	0.1443	1	8.36	KASDVHEVR
								815.802	814.795	1	814.528	0.2673	1	6.09	NIKIISK
								731.968	1461.92	2	1461.81	0.114	0	3.01	IYVDDGLISLQVK
								628.599	1882.77	3	1882.9	-0.1216	0	0.92	LNFSHGTHEYHAETIK
	P09874	PARP1_HUMAN	Poly [ADP-ribose] polymerase 1	36	113811	9	8.99	565.884	1129.75	2	1129.55	0.2049	0	31.91	GIYFADMVSK
								689.411	1376.81	2	1376.74	0.0669	0	24.72	TTNFAGILSQGLR
								1007.75	1006.74	1	1006.55	0.1919	1	6.82	ASLCISTKK
								617.811	1233.61	2	1233.6	0.0046	1	4.89	MEEVKEANIR	Oxidation (M)
								735.691	1469.37	2	1469.67	-0.305	0	2.46	MAIMVQSPMFDGK	Oxidation (M)
								360.207	1077.6	3	1077.54	0.0616	1	2.04	DEVKAMIEK	Oxidation (M)
								588.837	1175.66	2	1175.54	0.1252	1	0.28	IEREGECQR
								544.963	1631.87	3	1631.81	0.0568	1	0.23	TAEAGGVTGKGQDGIGSK
5548	Q01518	CAP1_HUMAN	Adenylyl cyclase-associated protein 1	49	52325	14.1	8.24	618.365	1234.72	2	1234.59	0.13	0	53.94	NSLDCEIVSAK
								442.854	883.694	2	883.48	0.214	0	22.76	QVAYIYK
								421.193	1260.56	3	1260.69	-0.1289	1	3.19	CVNTTLQIKGK
								1037.12	2072.22	2	2072.03	0.194	0	1.54	VENQENVSNLVIEDTELK
								729.961	2186.86	3	2187	-0.1391	1	0.39	LEAVSHTSDMHRGYADSPSK
5568	P30101	PDIA3_HUMAN	Protein disulfide-isomerase A3	114	57146	25.3	5.98	435.31	868.605	2	868.502	0.1032	0	2.63	DPNIVIAK
								439.276	876.537	2	876.482	0.0549	0	75.44	LNFAVASR
								470.273	938.532	2	938.471	0.0614	0	21.92	TVAYTEQK
								498.294	994.573	2	994.556	0.017	0	24.92	QAGPASVPLR
								1005.8	1004.8	1	1004.58	0.2196	1	1.43	LNFAVASRK
								542.833	1083.65	2	1083.56	0.091	0	35.97	YGVSGYPTLK
								542.875	1083.73	2	1083.56	0.1746	0	7.66	YGVSGYPTLK
								390.245	1167.71	3	1167.66	0.053	1	8.01	TADGIVSHLKK
								586.782	1171.55	2	1171.53	0.0161	0	37.25	FVMQEEFSR
								596.302	1190.59	2	1190.59	-0.0039	0	33.31	LAPEYEAAATR
								618.785	1235.56	2	1235.51	0.0501	0	33.48	DGEEAGAYDGPR
								671.346	1340.68	2	1340.68	0.0011	0	11.49	GFPTIYFSPANK
								684.851	1367.69	2	1367.66	0.0297	0	24.28	SEPIPESNDGPVK
								832.781	1663.55	2	1663.75	-0.2036	0	2.63	MDATANDVPSPYEVR
5587	P14618	KPYM_HUMAN	Pyruvate kinase isozymes M1/M2	38	58470	20.9	7.96	571.391	1140.77	2	1140.6	0.1643	0	32.25	GDLGIEIPAEK
								367.687	733.359	2	733.354	0.0048	0	30.73	SGMNVAR
								680.38	1358.75	2	1358.7	0.0477	0	29.04	NTGIICTIGPASR
								510.045	509.038	1	509.321	-0.2833	0	13.31	VVPVP
								442.567	1324.68	3	1324.7	-0.0198	1	6.14	VFLAQKMMIGR	2 Oxidation (M)
								815.88	814.873	1	814.528	0.3451	1	5.62	NIKIISK
								803.051	2406.13	3	2406.25	-0.1163	1	2.16	KGDVVIVLTGWRPGSGFTNTMR	Oxidation (M)
								876.922	2627.74	3	2627.41	0.3369	1	1.41	AGKPVICATQMLESMIKKPRPTR	Oxidation (M)
								769.812	2306.41	3	2306.14	0.277	1	1.35	CNRAGKPVICATQMLESMIK
	Q6ZRS2	SRCAP_HUMAN	Helicase SRCAP	37	344996	2.5	5.69	554.346	1106.68	2	1106.58	0.1022	1	36.98	IASTMAKDVR	Oxidation (M)
								734.774	2201.3	3	2201.11	0.1949	1	4.7	GARAETQGANHTPVISAHQTR
								446.853	1337.54	3	1337.64	-0.1033	1	1.34	QALMERFNADK	Oxidation (M)
								792.327	1582.64	2	1582.86	-0.2171	1	0.44	LPVSKDEPDTLTLR
								742.228	1482.44	2	1482.74	-0.294	1	0.23	SPFYLDSLEEKR
								522.928	1565.76	3	1565.82	-0.0549	1	0.16	HEAEIETRIAELR
5680	Q96AE4	FUBP1_HUMAN	Far upstream element-binding protein 1	52	67690	19.9	7.18	397.261	792.508	2	792.402	0.106	0	17.95	ITGDPYK
								436.787	871.559	2	871.451	0.108	0	45.87	IQNDAGVR
								467.27	932.525	2	932.467	0.0574	0	7.84	SISQQSGAR
								479.286	956.558	2	956.554	0.0034	0	19.96	LLDQIVEK
								534.322	1066.63	2	1066.58	0.0524	0	25.05	IAQITGPPDR
								574.846	1147.68	2	1147.56	0.1158	0	18.88	GTPQQIDYAR
								668.924	1335.83	2	1335.71	0.1187	0	31.82	IGGNEGIDVPIPR
								676.931	1351.85	2	1351.71	0.1384	0	15.58	IQIAPDSGGLPER
								662.888	1985.64	3	1985.97	-0.3234	0	1.61	MVMIQDGPQNTGADKPLR	Oxidation (M)
								928.745	2783.21	3	2783.21	0.0043	0	6.54	MADYSTVPPPSSGSAGGGGGGGGGGGVNDAFK	Oxidation (M)
5705	Q9UHD8	SEPT9_HUMAN	Septin-9	83	65646	20.1	9.06	524.285	1046.56	2	1046.52	0.0308	0	48.58	ADTLTLEER
								599.848	1197.68	2	1197.61	0.0711	0	46.74	QVENAGAIGPSR
								526.384	1050.75	2	1050.68	0.0733	0	35.35	VVNIVPVIAK
								639.362	1276.71	2	1276.64	0.0693	0	34.87	YLQEEVNINR
								528.822	1055.63	2	1055.49	0.1367	0	17.51	FINDQYEK
								403.755	805.495	2	805.433	0.0619	0	15.78	FQDLGVK
								732.36	1462.7	2	1462.77	-0.0621	0	15.61	VPEVPTAPATDAAPK
								536.259	1070.5	2	1070.52	-0.022	0	7.63	SITHDIEEK
								760.734	759.727	1	759.351	0.376	0	7.41	NSEPSAR
								455.327	908.64	2	908.519	0.1205	1	5.05	RAEVLGHK
								371.866	1112.57	3	1112.59	-0.0189	1	2.43	DAGLKQAPASR
								749.432	1496.85	2	1496.81	0.0356	1	1.81	DLLIRTHMQNIK	Oxidation (M)
5715	P19338	NUCL_HUMAN	Nucleolin	114	76625	9.2	4.6	797.901	1593.79	2	1593.74	0.0521	0	73.65	GYAFIEFASFEDAK
								834.503	2500.49	3	2500.26	0.228	0	54.15	TLVLSNLSYSATEETLQEVFEK
								820.434	819.426	1	819.41	0.0163	1	4.94	GGRGGFGGR
								656.505	655.497	1	655.336	0.1609	0	0.35	MAPPPK	Oxidation (M)
	Q6S8J3	POTEE_HUMAN	POTE ankyrin domain family member E	81	122882	10.1	5.83	597.653	1789.94	3	1789.88	0.0517	0	44.27	SYELPDGQVITIGNER
								488.715	975.416	2	975.441	-0.0247	0	38.1	AGFAGDDAPR
								850.802	2549.39	3	2549.17	0.2189	0	27.88	LCYVALDFEQEMATAASSSSLEK
								1107.58	3319.71	3	3319.45	0.2618	0	5.22	CPEALFQPCFLGMESCGIHETTFNSIMK	Oxidation (M)
								741.06	2220.16	3	2220.22	-0.065	1	3.45	TALHLASANGNSEVVKLLLDR
								398.605	1192.79	3	1192.58	0.2089	0	1.76	EIAALAPSMMK	2 Oxidation (M)
	P63261	ACTG_HUMAN	Actin, cytoplasmic 2	81	42108	24.3	5.31	597.653	1789.94	3	1789.88	0.0517	0	44.27	SYELPDGQVITIGNER
								488.715	975.416	2	975.441	-0.0247	0	38.1	AGFAGDDAPR
								850.802	2549.39	3	2549.17	0.2189	0	27.88	LCYVALDFEQEMATAASSSSLEK
								661.686	1982.04	3	1981.88	0.1575	0	4.81	MEEEIAALVIDNGSGMCK	Oxidation (M)
								878.681	2633.02	3	2633.25	-0.226	1	2.89	DLYANTVLSGGTTMYPGIADRMQK	2 Oxidation (M)
								617.995	1850.96	3	1850.84	0.1243	0	0.88	EEEIAALVIDNGSGMCK	Oxidation (M)
	P68133	ACTS_HUMAN	Actin, alpha skeletal muscle	77	42366	13.5	5.23	597.653	1789.94	3	1789.88	0.0517	0	44.27	SYELPDGQVITIGNER
								488.715	975.416	2	975.441	-0.0247	0	38.1	AGFAGDDAPR
								802.637	2404.89	3	2405.1	-0.2095	1	11.25	KDLYANNVMSGGTTMYPGIADR	2 Oxidation (M)
								888.956	2663.85	3	2664.2	-0.3524	1	0.74	DLYANNVMSGGTTMYPGIADRMQK	2 Oxidation (M)
	P62736	ACTA_HUMAN	Actin, aortic smooth muscle	77	42381	13.3	5.23	597.653	1789.94	3	1789.88	0.0517	0	44.27	SYELPDGQVITIGNER
								488.715	975.416	2	975.441	-0.0247	0	38.1	AGFAGDDAPR
								883.08	2646.22	3	2646.24	-0.0232	1	2.68	DLYANNVLSGGTTMYPGIADRMQK	2 Oxidation (M)
	Q562R1	ACTBL_HUMAN	Beta-actin-like protein 2	66	42318	10.6	5.39	597.653	1789.94	3	1789.88	0.0517	0	44.27	SYELPDGQVITIGNER
								863.443	2587.31	3	2587.24	0.0664	1	0.83	DLYANTVLSGGSTMYPGIADRMQK
	P14618	KPYM_HUMAN	Pyruvate kinase isozymes M1/M2	61	58470	5.8	7.96	626	1874.98	3	1874.89	0.0901	0	45.66	FGVEQDVDMVFASFIR	Oxidation (M)
								555.983	1664.93	3	1664.81	0.1184	0	0.66	FDEILEASDGIMVAR

## Sheet: Table S2
Table S2: List of Uniprot ID of proteins altered by dopamine used for the enrichment analyses.
Uniprot ID
A5A3E0
O75390
O75947
P02545
P04075
P04406
P05141
P07339
P07437
P08107
P08238
P08238
P08865
P0CG38
P11021
P12236
P14618
P14625
P16401
P17066
P21796
P23528
P29966
P30048
P30101
P34897
P35232
P45880
P49411
P60709
P62736
P62805
P63244
P63261
P68104
P82650
Q04837
Q07021
Q562R1
Q58FF8
Q6S8J3
Q6ZRS2
Q8IV08
Q9BYX7
Q9UHD8
Q9Y265

## Sheet: Table S3
Table S3: Significantly enriched categories of the disease association analysis.
Disease Shock DB_ID:PA445644
C=287;O=12;E=0.27;R=43.98;rawP=3.98e-17;adjP=2.23e-15a
Uniprot ID	Gene Symbol	Description
P14625	HSP90B1	heat shock protein 90kDa beta (Grp94), member 1
P08238	HSP90AB1	heat shock protein 90kDa alpha (cytosolic), class B member 1
P11021	HSPA5	heat shock 70kDa protein 5 (glucose-regulated protein, 78kDa)
P35232	PHB	prohibitin
P30101	PDIA3	protein disulfide isomerase family A, member 3
P60709	ACTB	actin, beta
Q04837	SSBP1	single-stranded DNA binding protein 1, mitochondrial
P14618	PKM	pyruvate kinase, muscle
P07437	TUBB	tubulin, beta class I
P23528	CFL1	cofilin 1 (non-muscle)
P12236	SLC25A6	solute carrier family 25 (mitochondrial carrier; adenine nucleotide translocator), member 6
P17066	HSPA6	heat shock 70kDa protein 6 (HSP70B')
Disease Stress DB_ID:PA445752
C=464;O=11;E=0.44;R=24.94;rawP=4.70e-13;adjP=1.32e-11a
P04406	GAPDH	glyceraldehyde-3-phosphate dehydrogenase
P14625	HSP90B1	heat shock protein 90kDa beta (Grp94), member 1
P63261	ACTG1	actin, gamma 1
P30048	PRDX3	peroxiredoxin 3
P08238	HSP90AB1	heat shock protein 90kDa alpha (cytosolic), class B member 1
P11021	HSPA5	heat shock 70kDa protein 5 (glucose-regulated protein, 78kDa)
P35232	PHB	prohibitin
P30101	PDIA3	protein disulfide isomerase family A, member 3
P60709	ACTB	actin, beta
P23528	CFL1	cofilin 1 (non-muscle)
P17066	HSPA6	heat shock 70kDa protein 6 (HSP70B')
disease Mitochondrial Diseases DB_ID:PA447172
C=269;O=6;E=0.26;R=23.46;rawP=2.08e-07;adjP=2.91e-06a
P82650	MRPS22	mitochondrial ribosomal protein S22
P21796	VDAC1	voltage-dependent anion channel 1
P12236	SLC25A6	solute carrier family 25 (mitochondrial carrier; adenine nucleotide translocator), member 6
P35232	PHB	prohibitin
P49411	TUFM	Tu translation elongation factor, mitochondrial
O75390	CS	citrate synthase

## Sheet: Table S4
Table S4: Protein-Protein interactions. Proteins identified by Shotgun proteomics or 2-DE are highlighted.
N	Gene 1	Gene 2	Interaction Context
1	P14625	Q9NZJ5	PUBMED:11907036,PSI-MI:"MI:0915"(PHYSICAL ASSOCIATION)
2	P63261	Q13546	PUBMED:14743216,PSI-MI:"MI:0915"(PHYSICAL ASSOCIATION)
3	P63261	P23528	PUBMED:16189514,PSI-MI:"MI:0915"(PHYSICAL ASSOCIATION)
4	Q99623	Q13530	PUBMED:17353931,PSI-MI:"MI:0915"(PHYSICAL ASSOCIATION)
5	Q04864	Q07021	PUBMED:14743216,PSI-MI:"MI:0915"(PHYSICAL ASSOCIATION)
6	Q04864	P17066	PUBMED:14743216,PSI-MI:"MI:0915"(PHYSICAL ASSOCIATION)
7	P35232	Q9NXR7	IMEX:IM-12079
			PUBMED:19615732,PSI-MI:"MI:0915"(PHYSICAL ASSOCIATION)
8	P35232	Q13268	PUBMED:15047060,PSI-MI:"MI:0915"(PHYSICAL ASSOCIATION)
9	Q13131	P05141	PUBMED:16306228,PSI-MI:"MI:0914"(ASSOCIATION)
10	Q13131	P11021	PUBMED:16306228,PSI-MI:"MI:0914"(ASSOCIATION)
11	Q9NZJ5	P14625	PUBMED:11907036,PSI-MI:"MI:0915"(PHYSICAL ASSOCIATION)
12	Q9NZJ5	P11021	PUBMED:11907036,PSI-MI:"MI:0915"(PHYSICAL ASSOCIATION)
13	P30101	O15264	PUBMED:19135240
			IMEX:IM-12163,PSI-MI:"MI:0914"(ASSOCIATION)
14	Q13546	P63261	PUBMED:14743216,PSI-MI:"MI:0915"(PHYSICAL ASSOCIATION)
15	Q13546	P05141	PUBMED:14743216,PSI-MI:"MI:0915"(PHYSICAL ASSOCIATION)
16	Q13546	P08107	PUBMED:14743216,PSI-MI:"MI:0915"(PHYSICAL ASSOCIATION)
17	Q13546	P07437	PUBMED:14743216,PSI-MI:"MI:0915"(PHYSICAL ASSOCIATION)
18	P08107	Q13546	PUBMED:14743216,PSI-MI:"MI:0915"(PHYSICAL ASSOCIATION)
19	Q07021	Q13077	PUBMED:14743216,PSI-MI:"MI:0915"(PHYSICAL ASSOCIATION)
20	Q07021	P12830	PUBMED:16212417,PSI-MI:"MI:0914"(ASSOCIATION)
21	Q07021	Q9NYJ8	PUBMED:14743216,PSI-MI:"MI:0915"(PHYSICAL ASSOCIATION)
22	Q07021	Q04864	PUBMED:14743216,PSI-MI:"MI:0915"(PHYSICAL ASSOCIATION)
23	P02545	P12830	PUBMED:16212417,PSI-MI:"MI:0915"(PHYSICAL ASSOCIATION)
24	Q9NXR7	P34897	IMEX:IM-12079
			PUBMED:19615732,PSI-MI:"MI:0915"(PHYSICAL ASSOCIATION)
25	Q9NXR7	P35232	IMEX:IM-12079
			PUBMED:19615732,PSI-MI:"MI:0915"(PHYSICAL ASSOCIATION)
26	P12830	Q07021	PUBMED:16212417,PSI-MI:"MI:0914"(ASSOCIATION)
27	P12830	P02545	PUBMED:16212417,PSI-MI:"MI:0915"(PHYSICAL ASSOCIATION)
28	O75390	O00141	PUBMED:17353931,PSI-MI:"MI:0915"(PHYSICAL ASSOCIATION)
29	O75390	Q9NYJ8	PUBMED:14743216,PSI-MI:"MI:0915"(PHYSICAL ASSOCIATION)
30	O00141	P29966	PUBMED:17353931,PSI-MI:"MI:0915"(PHYSICAL ASSOCIATION)
31	O00141	O75390	PUBMED:17353931,PSI-MI:"MI:0915"(PHYSICAL ASSOCIATION)
32	Q7L0Y3	P34897	PUBMED:18984158
			IMEX:IM-12139,PSI-MI:"MI:0915"(PHYSICAL ASSOCIATION)
33	Q7L0Y3	P49411	PUBMED:18984158
			IMEX:IM-12139,PSI-MI:"MI:0915"(PHYSICAL ASSOCIATION)
34	P34897	Q5JWF2	PUBMED:17353931,PSI-MI:"MI:0915"(PHYSICAL ASSOCIATION)
35	P34897	Q7L0Y3	PUBMED:18984158
			IMEX:IM-12139,PSI-MI:"MI:0915"(PHYSICAL ASSOCIATION)
36	P34897	Q9NXR7	IMEX:IM-12079
			PUBMED:19615732,PSI-MI:"MI:0915"(PHYSICAL ASSOCIATION)
37	Q04837	P16104	PUBMED:20000738,PSI-MI:"MI:0914"(ASSOCIATION)
38	P29966	O00141	PUBMED:17353931,PSI-MI:"MI:0915"(PHYSICAL ASSOCIATION)
39	P29966	O15264	PUBMED:19135240
			IMEX:IM-12163,PSI-MI:"MI:0914"(ASSOCIATION)
40	P07339	P28482	PUBMED:18624398,PSI-MI:"MI:0915"(PHYSICAL ASSOCIATION)
41	P07339	P16104	PUBMED:20000738,PSI-MI:"MI:0914"(ASSOCIATION)
42	P23528	P60709	PUBMED:16189514,PSI-MI:"MI:0915"(PHYSICAL ASSOCIATION)
43	P23528	P63261	PUBMED:16189514,PSI-MI:"MI:0915"(PHYSICAL ASSOCIATION)
44	P04406	P28482	PUBMED:18624398,PSI-MI:"MI:0915"(PHYSICAL ASSOCIATION)
45	P04406	Q13268	PUBMED:15047060,PSI-MI:"MI:0915"(PHYSICAL ASSOCIATION)
46	P49450	P62805	PUBMED:19410544
			IMEX:IM-12179,PSI-MI:"MI:0914"(ASSOCIATION)
47	P49450	Q9Y265	PUBMED:19410544
			IMEX:IM-12179,PSI-MI:"MI:0914"(ASSOCIATION)
48	Q9BYX7	P49407	PUBMED:17620599,PSI-MI:"MI:0914"(ASSOCIATION)
49	Q9BYX7	P20333	PUBMED:14743216,PSI-MI:"MI:0915"(PHYSICAL ASSOCIATION)
50	Q9Y6E7	P05141	PUBMED:17715127,PSI-MI:"MI:0915"(PHYSICAL ASSOCIATION)
51	Q9Y6E7	P12236	PUBMED:17715127,PSI-MI:"MI:0915"(PHYSICAL ASSOCIATION)
52	P08238	P14618	PUBMED:16263121,PSI-MI:"MI:0914"(ASSOCIATION)
53	P08238	P04075	PUBMED:16263121,PSI-MI:"MI:0914"(ASSOCIATION)
54	P08238	P08865	PUBMED:16263121,PSI-MI:"MI:0914"(ASSOCIATION)
55	P11021	Q13131	PUBMED:16306228,PSI-MI:"MI:0914"(ASSOCIATION)
56	P11021	Q9NZJ5	PUBMED:11907036,PSI-MI:"MI:0915"(PHYSICAL ASSOCIATION)
57	P45880	P60709	PUBMED:15047060,PSI-MI:"MI:0915"(PHYSICAL ASSOCIATION)
58	P45880	Q13530	PUBMED:17353931,PSI-MI:"MI:0915"(PHYSICAL ASSOCIATION)
59	P45880	Q13268	PUBMED:15047060,PSI-MI:"MI:0915"(PHYSICAL ASSOCIATION)
60	P49411	Q7L0Y3	PUBMED:18984158
			IMEX:IM-12139,PSI-MI:"MI:0915"(PHYSICAL ASSOCIATION)
61	P63244	P12236	PUBMED:16169070,PSI-MI:"MI:0915"(PHYSICAL ASSOCIATION)
62	P21796	Q13268	PUBMED:15047060,PSI-MI:"MI:0915"(PHYSICAL ASSOCIATION)
63	P14618	P08238	PUBMED:16263121,PSI-MI:"MI:0914"(ASSOCIATION)
64	P05141	Q13546	PUBMED:14743216,PSI-MI:"MI:0915"(PHYSICAL ASSOCIATION)
65	P05141	Q13077	PUBMED:14743216,PSI-MI:"MI:0915"(PHYSICAL ASSOCIATION)
66	P05141	Q9Y6E7	PUBMED:17715127,PSI-MI:"MI:0915"(PHYSICAL ASSOCIATION)
67	P05141	Q13131	PUBMED:16306228,PSI-MI:"MI:0914"(ASSOCIATION)
68	P08865	P60709	PUBMED:15047060,PSI-MI:"MI:0915"(PHYSICAL ASSOCIATION)
69	P08865	P08238	PUBMED:16263121,PSI-MI:"MI:0914"(ASSOCIATION)
70	P17066	P20333	PUBMED:14743216,PSI-MI:"MI:0915"(PHYSICAL ASSOCIATION)
71	P17066	Q04864	PUBMED:14743216,PSI-MI:"MI:0915"(PHYSICAL ASSOCIATION)
72	P20333	Q9BYX7	PUBMED:14743216,PSI-MI:"MI:0915"(PHYSICAL ASSOCIATION)
73	P20333	P17066	PUBMED:14743216,PSI-MI:"MI:0915"(PHYSICAL ASSOCIATION)
74	P62805	P49450	PUBMED:19410544
			IMEX:IM-12179,PSI-MI:"MI:0914"(ASSOCIATION)
75	Q5JWF2	P34897	PUBMED:17353931,PSI-MI:"MI:0915"(PHYSICAL ASSOCIATION)
76	Q5JWF2	Q9Y265	PUBMED:17353931,PSI-MI:"MI:0915"(PHYSICAL ASSOCIATION)
77	Q6ZRS2	Q9Y265	PUBMED:16230350,PSI-MI:"MI:0914"(ASSOCIATION)
78	Q9Y265	Q5JWF2	PUBMED:17353931,PSI-MI:"MI:0915"(PHYSICAL ASSOCIATION)
79	Q9Y265	Q6ZRS2	PUBMED:16230350,PSI-MI:"MI:0914"(ASSOCIATION)
80	Q9Y265	P49450	PUBMED:19410544
			IMEX:IM-12179,PSI-MI:"MI:0914"(ASSOCIATION)
81	Q13077	P05141	PUBMED:14743216,PSI-MI:"MI:0915"(PHYSICAL ASSOCIATION)
82	Q13077	Q07021	PUBMED:14743216,PSI-MI:"MI:0915"(PHYSICAL ASSOCIATION)
83	P30048	P16104	PUBMED:20000738,PSI-MI:"MI:0914"(ASSOCIATION)
84	Q9NYJ8	Q07021	PUBMED:14743216,PSI-MI:"MI:0915"(PHYSICAL ASSOCIATION)
85	Q9NYJ8	O75390	PUBMED:14743216,PSI-MI:"MI:0915"(PHYSICAL ASSOCIATION)
86	Q13268	P04406	PUBMED:15047060,PSI-MI:"MI:0915"(PHYSICAL ASSOCIATION)
87	Q13268	P21796	PUBMED:15047060,PSI-MI:"MI:0915"(PHYSICAL ASSOCIATION)
88	Q13268	P35232	PUBMED:15047060,PSI-MI:"MI:0915"(PHYSICAL ASSOCIATION)
89	Q13268	P45880	PUBMED:15047060,PSI-MI:"MI:0915"(PHYSICAL ASSOCIATION)
90	P04075	P08238	PUBMED:16263121,PSI-MI:"MI:0914"(ASSOCIATION)
91	P16104	Q04837	PUBMED:20000738,PSI-MI:"MI:0914"(ASSOCIATION)
92	P16104	P07339	PUBMED:20000738,PSI-MI:"MI:0914"(ASSOCIATION)
93	P16104	P30048	PUBMED:20000738,PSI-MI:"MI:0914"(ASSOCIATION)
94	P49407	Q9BYX7	PUBMED:17620599,PSI-MI:"MI:0914"(ASSOCIATION)
95	P49407	Q562R1	PUBMED:17620599,PSI-MI:"MI:0914"(ASSOCIATION)
96	P60709	P08865	PUBMED:15047060,PSI-MI:"MI:0915"(PHYSICAL ASSOCIATION)
97	P60709	P23528	PUBMED:16189514,PSI-MI:"MI:0915"(PHYSICAL ASSOCIATION)
98	P60709	P45880	PUBMED:15047060,PSI-MI:"MI:0915"(PHYSICAL ASSOCIATION)
99	O15264	P30101	PUBMED:19135240
			IMEX:IM-12163,PSI-MI:"MI:0914"(ASSOCIATION)
100	O15264	P29966	PUBMED:19135240
			IMEX:IM-12163,PSI-MI:"MI:0914"(ASSOCIATION)
101	P28482	P04406	PUBMED:18624398,PSI-MI:"MI:0915"(PHYSICAL ASSOCIATION)
102	P28482	P07339	PUBMED:18624398,PSI-MI:"MI:0915"(PHYSICAL ASSOCIATION)
103	Q13530	Q99623	PUBMED:17353931,PSI-MI:"MI:0915"(PHYSICAL ASSOCIATION)
104	Q13530	P45880	PUBMED:17353931,PSI-MI:"MI:0915"(PHYSICAL ASSOCIATION)
105	Q562R1	P49407	PUBMED:17620599,PSI-MI:"MI:0914"(ASSOCIATION)
106	P12236	P63244	PUBMED:16169070,PSI-MI:"MI:0915"(PHYSICAL ASSOCIATION)
107	P12236	Q9Y6E7	PUBMED:17715127,PSI-MI:"MI:0915"(PHYSICAL ASSOCIATION)
108	P07437	Q13546	PUBMED:14743216,PSI-MI:"MI:0915"(PHYSICAL ASSOCIATION)
